# Supplementary material
Source: PubMed Central journal article supplement (PMC2806886)
Supplement: jn.109.112763_1.pdf [file jn.109.112763_1.pdf]

## Online Supporting Material

### Supplemental Table 1

Proportion of snackers over a 2-d period by sociodemographic characteristics in the National Health and Nutrition Examination Surveys (NHANES), 2003-2006<sup>1</sup>.

| <i>Sociodemographic characteristics</i> | Percent who snack        |                          |                        |                        |
|-----------------------------------------|--------------------------|--------------------------|------------------------|------------------------|
|                                         | Ages 19-39 y<br>(n=3805) | Ages 40-59 y<br>(n=2627) | Ages ≥60 y<br>(n=3058) | Ages ≥19 y<br>(n=9490) |
| Males                                   | 97.5                     | 97.6                     | 96.5                   | 97.3                   |
| Females                                 | 97.0                     | 98.4                     | 96.5                   | 97.4                   |
| Ethnicity <sup>2</sup>                  |                          |                          |                        |                        |
| White, non-Hispanic                     | 98.0                     | 98.5                     | 96.8                   | 97.9                   |
| Black, non-Hispanic                     | 95.2                     | 96.8                     | 95.6                   | 95.9                   |
| Hispanic                                | 95.8                     | 96.0                     | 93.6                   | 95.6                   |
| Income level <sup>3</sup>               |                          |                          |                        |                        |
| <185% national poverty level            | 96.5                     | 96.9                     | 95.4                   | 96.3                   |
| 185-350% national poverty level         | 96.4                     | 97.3                     | 97.1                   | 96.9                   |
| >350% national poverty level            | 98.6                     | 98.9                     | 97.3                   | 98.5                   |
| Household's education                   |                          |                          |                        |                        |
| ≤ high school diploma                   | 96.0                     | 98.2                     | 96.1                   | 96.8                   |
| ≥ high school diploma                   | 98.1                     | 98.1                     | 96.9                   | 97.9                   |

---

<sup>1</sup>Data are weighted to account for survey design effects and to be nationally representative.

<sup>2</sup> Mexican American and Other Hispanic were included in the Hispanic group.

<sup>3</sup> To more accurately represent income level, household income is expressed as a percentage of the Federal poverty thresholds adjusted for inflation. Each household's income is expressed as a percentage of the of the poverty thresholds of the appropriate size. Poverty thresholds are provided by the Bureau of Census (61).

## Online Supporting Material

### Supplemental Table 2.

Trends in energy density of meals and snacking (food, beverages or both) occasions in U.S. adults aged  $\geq 19$  years old.

|                                    | ENERGY DENSITY (kJ/g and kcal/g) <sup>1</sup> |      |                    |                   |                    |                    |                     |                     |
|------------------------------------|-----------------------------------------------|------|--------------------|-------------------|--------------------|--------------------|---------------------|---------------------|
|                                    | 1977-78                                       |      | 1989-91            |                   | 1994-96            |                    | 2003-06             |                     |
| <b>Ages 19-39 y</b>                | kJ                                            | kcal | kJ                 | kcal              | kJ                 | kcal               | kJ                  | kcal                |
| Total snacking                     | 3.73                                          | 0.89 | 4.10 <sup>a</sup>  | 0.98 <sup>a</sup> | 4.15 <sup>a</sup>  | 0.99 <sup>a</sup>  | 4.44 <sup>a</sup>   | 1.06 <sup>a</sup>   |
| Total meals                        | 4.52                                          | 1.08 | 4.52               | 1.08              | 4.40               | 1.05               | 4.56 <sup>c</sup>   | 1.09 <sup>c</sup>   |
| Snacking food                      | 12.06                                         | 2.88 | 12.35              | 2.95              | 11.85              | 2.83               | 12.31               | 2.94                |
| Meals food                         | 7.87                                          | 1.88 | 8.00               | 1.91              | 7.70 <sup>b</sup>  | 1.84 <sup>b</sup>  | 8.21 <sup>ac</sup>  | 1.96 <sup>ac</sup>  |
| Snacking beverages                 | 1.26                                          | 0.30 | 1.21               | 0.29              | 1.30               | 0.31               | 1.47 <sup>abc</sup> | 0.35 <sup>abc</sup> |
| Meals beverages                    | 1.30                                          | 0.31 | 1.30               | 0.31              | 1.30               | 0.31               | 1.38 <sup>abc</sup> | 0.33 <sup>abc</sup> |
| <b>Ages 40-59 y</b>                | kJ                                            | kcal | kJ                 | kcal              | kJ                 | kcal               | kJ                  | kcal                |
| Total snacking                     | 3.43                                          | 0.82 | 3.43               | 0.82              | 3.89 <sup>ab</sup> | 0.93 <sup>ab</sup> | 3.94 <sup>ab</sup>  | 0.94 <sup>ab</sup>  |
| Total meals                        | 4.06                                          | 0.97 | 4.06               | 0.97              | 3.98               | 0.95               | 4.06                | 0.97                |
| Snacking food                      | 11.39                                         | 2.72 | 12.10 <sup>a</sup> | 2.89 <sup>a</sup> | 11.51 <sup>b</sup> | 2.75 <sup>b</sup>  | 11.81               | 2.82                |
| Meals food                         | 7.33                                          | 1.75 | 7.37               | 1.76              | 7.24               | 1.73               | 7.70 <sup>abc</sup> | 1.84 <sup>abc</sup> |
| Snacking beverages                 | 1.00                                          | 0.24 | 0.92               | 0.22              | 1.00               | 0.24               | 1.13 <sup>b</sup>   | 0.27 <sup>b</sup>   |
| Meals beverages                    | 0.92                                          | 0.22 | 0.96               | 0.23              | 0.96               | 0.23               | 1.00 <sup>a</sup>   | 0.24 <sup>a</sup>   |
| <b>Ages <math>\geq 60</math> y</b> | kJ                                            | kcal | kJ                 | kcal              | kJ                 | kcal               | kJ                  | kcal                |
| Total snacking                     | 4.23                                          | 1.01 | 4.23               | 1.01              | 4.52               | 1.08               | 4.73 <sup>a</sup>   | 1.13 <sup>a</sup>   |
| Total meals                        | 3.98                                          | 0.95 | 3.77 <sup>a</sup>  | 0.90 <sup>a</sup> | 3.77 <sup>a</sup>  | 0.90 <sup>a</sup>  | 3.85 <sup>ac</sup>  | 0.92 <sup>ac</sup>  |

Snacking food 10.76 2.57 10.30 2.46 10.22 2.44 11.26<sup>bc</sup> 2.69<sup>bc</sup>

Supplemental Table 2 Cont'd

|                    | ENERGY DENSITY (kJ/g and kcal/g) <sup>1</sup> |             |                   |                   |                    |                   |                     |                     |
|--------------------|-----------------------------------------------|-------------|-------------------|-------------------|--------------------|-------------------|---------------------|---------------------|
|                    | 1977-78                                       |             | 1989-91           |                   | 1994-96            |                   | 2003-06             |                     |
| Meals food         | 6.99                                          | 1.67        | 6.57 <sup>a</sup> | 1.57 <sup>a</sup> | 6.49 <sup>a</sup>  | 1.55 <sup>a</sup> | 6.99 <sup>bc</sup>  | 1.67 <sup>bc</sup>  |
| Snacking beverages | 1.30                                          | 0.31        | 1.30              | 0.31              | 1.26               | 0.30              | 1.21                | 0.29                |
| Meals beverages    | 0.88                                          | 0.21        | 0.96              | 0.23              | 0.88               | 0.21              | 0.92                | 0.22                |
| <b>Ages ≥ 19 y</b> | <b>kJ</b>                                     | <b>kcal</b> | <b>kJ</b>         | <b>kcal</b>       | <b>kJ</b>          | <b>kcal</b>       | <b>kJ</b>           | <b>kcal</b>         |
| Total snacking     | 3.73                                          | 0.89        | 3.89              | 0.93              | 4.15 <sup>a</sup>  | 0.99 <sup>a</sup> | 4.31 <sup>ab</sup>  | 1.03 <sup>ab</sup>  |
| Total meals        | 4.23                                          | 1.01        | 4.19              | 1.00              | 4.10 <sup>a</sup>  | 0.98 <sup>a</sup> | 4.23 <sup>c</sup>   | 1.01 <sup>c</sup>   |
| Snacking food      | 11.60                                         | 2.77        | 11.77             | 2.81              | 11.35 <sup>b</sup> | 2.71 <sup>b</sup> | 11.85 <sup>c</sup>  | 2.83 <sup>c</sup>   |
| Meals food         | 7.49                                          | 1.79        | 7.45              | 1.78              | 7.24 <sup>a</sup>  | 1.73 <sup>a</sup> | 7.75 <sup>abc</sup> | 1.85 <sup>abc</sup> |
| Snacking beverages | 1.17                                          | 0.28        | 1.13              | 0.27              | 1.21               | 0.29              | 1.30 <sup>ab</sup>  | 0.31 <sup>ab</sup>  |
| Meals beverages    | 1.09                                          | 0.26        | 1.09              | 0.26              | 1.09               | 0.26              | 1.13                | 0.27                |

<sup>1</sup> Total snacking and meals energy density combines food plus beverages.

<sup>a</sup> Significantly different from 1977-78.  $P < 0.01$  (Student's *t* test).

<sup>b</sup> Significantly different from 1989-91.  $P < 0.01$  (Student's *t* test).

<sup>c</sup> Significantly different from 1994-96.  $P < 0.01$  (Student's *t* test).
